# Supplementary material
Source: ML conference proceedings conference paper supplement (https://openreview.net/forum?id=B8_T6-8-tCU)
Supplement: supplementary_material [file attachment]

## A PROOF OF THEOREM 1.2

Our proof of Theorem 1.2 is structured as follows. First, we show that any  $f \in \text{RidgelessReLU}(\mathbf{D})$  satisfies properties (1) and (2). This constitutes the majority of the argument and requires several preparatory results, starting with Proposition A.1 and its Corollary A.1. With these in hand, we derive in Propositions A.4, A.5, and A.6 constraints on the local behavior of  $f$  on small intervals of the form  $(x_i, x_{i+1})$  or  $(x_{i-1}, x_{i+1})$ . Taken together these Propositions, and several other results, imply properties (1) and (2). The details for this step are around Lemma A.3. Finally, establish in Proposition A.7 that any  $f$  which satisfies properties (1) and (2) belongs to  $\text{RidgelessReLU}(\mathbf{D})$ . To start, we introduce some notation. For each  $f \in \text{PL}(\mathbf{D})$  and every  $x \in \mathbb{R}$ , let us write

$$s_{\text{in}}(x) = s_{\text{in}}(f, x) := \lim_{\epsilon \rightarrow 0^+} Df(x - \epsilon), \quad s_{\text{out}}(x) = s_{\text{out}}(f, x) := \lim_{\epsilon \rightarrow 0^+} Df(x + \epsilon)$$

for the incoming and outgoing slopes of  $f$  at  $x$ . For any  $f \in \text{PL}$  the second derivative  $D^2f$  is an atomic measure and we have

$$D^2f = \sum_{j=1}^k c_j \delta_{\xi_j}, \quad c_j = s_{\text{out}}(f, \xi_j) - s_{\text{in}}(f, \xi_j)$$

where  $\xi_j$  are the points of discontinuity for the derivative  $Df$ . We will usually suppress  $f$  from the notation. Thus,  $Df$ , and in particular  $Dz$  for any one layer ReLU network  $z$ , has a well-defined total variation

$$\|Df\|_{TV} := \sum_{j=1}^k |c_j|.$$

Much of the remainder of our proof results on the following fundamental observation.

**Proposition A.1.** *Fix  $f \in \text{RidgelessReLU}(\mathbf{D})$ . For every  $i = 1, \dots, m-1$  and  $Df$  is monotone on  $(x_i, x_{i+1})$  in the sense that the functions  $s_{\text{in}}(f, x)$  and  $s_{\text{out}}(f, x)$  are both either non-increasing or non-decreasing for  $x \in (x_i, x_{i+1})$ .*

*Proof.* We proceed by contradiction. That is, let us suppose that  $f \in \text{RidgelessReLU}(\mathbf{D})$  and that for some  $i$  there exist

$$x_i \leq \xi_1 < \xi_2 < \xi_3 < \xi_4 \leq x_{i+1}$$

such that  $f$  is given by distinct affine functions with slopes  $\sigma_j$  when restricted to any of  $(\xi_j, \xi_{j+1})$  for  $j = 1, 2, 3$  but that the sequence  $\sigma_1, \sigma_2, \sigma_3$  is not monotone. Without loss of generality we assume

$$\sigma_1, \sigma_3 < \sigma_2. \quad (9)$$

In particular, for all  $\delta$  sufficiently small, we have

$$\text{Total Variation of } Df \text{ on } (\xi_1 - \delta, \xi_4 + \delta) = 2\sigma_2 - \sigma_1 - \sigma_3 + |\sigma_1 - \sigma_{\text{in}}| + |\sigma_3 - \sigma_{\text{out}}|, \quad (10)$$

where

$$\sigma_{\text{in}} := s_{\text{in}}(f, \xi_1) = \lim_{\epsilon \rightarrow 0^+} Df(\xi_1 - \epsilon)$$

and

$$\sigma_{\text{out}} := s_{\text{out}}(f, \xi_4) = \lim_{\epsilon \rightarrow 0^+} Df(\xi_4 + \epsilon).$$

Define

$$\sigma_* := \frac{f(\xi_4) - f(\xi_1)}{\xi_1 - \xi_4} = \frac{\sigma_1(\xi_2 - \xi_1) + \sigma_2(\xi_3 - \xi_2) + \sigma_3(\xi_4 - \xi_3)}{\xi_4 - \xi_1}.$$

Note that the constraint equation 9 and the fact that  $\sigma_*$  is a convex combination of  $\sigma_j$  guarantees that

$$\min\{\sigma_1, \sigma_3\} < \sigma_* < \sigma_2. \quad (11)$$

See Figure 8 for the three possible cases. Consider  $g \in \text{PL}(\mathbf{D})$  defined as follows:

$$g(x) = \begin{cases} f(x), & x \in (\xi_1, \xi_4)^c \\ \sigma_*(x - \xi_1) + f(\xi_1), & x \in (\xi_1, \xi_4) \end{cases}.$$

The function  $g$  represents a "straightening of  $f$ " between  $\xi_1$  and  $\xi_4$ , and we will now show that the total variation of  $Dg$  on  $(\xi_1 - \delta, \xi_4 + \delta)$  is strictly smaller than that of  $Df$  on the same interval. Since

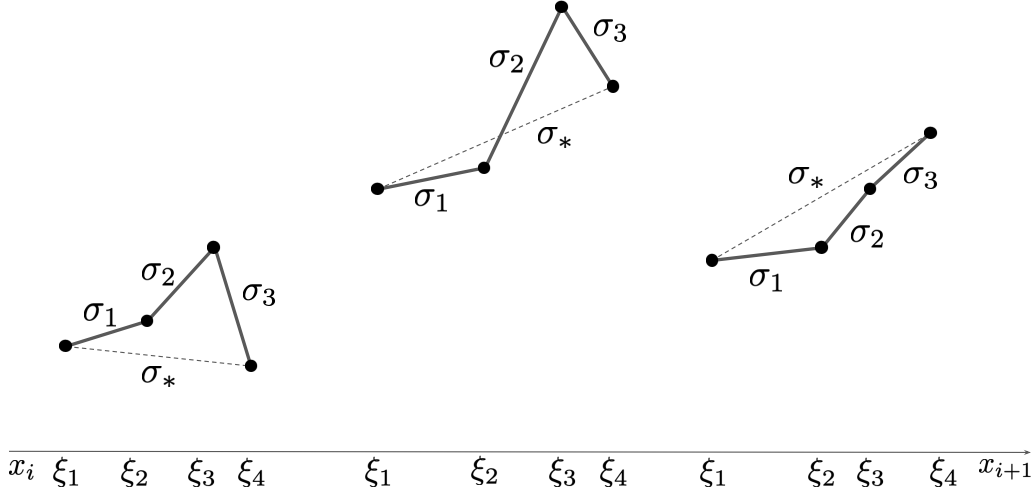

Figure 8: The three possible relative configurations for  $\sigma_j, \sigma_*$  are shown. On the left,  $\sigma_3 < \sigma_* \leq \sigma_1 < \sigma_2$ . In the center  $\sigma_1, \sigma_3 < \sigma_* < \sigma_2$ . On the right,  $\sigma_1 < \sigma_* < \sigma_3 < \sigma_2$ .

the total variations of  $Df$  and  $Dg$  agree on  $(\xi_1, \xi_4)^c$  this will contradict the minimality of  $\|Df\|_{TV}$  over  $\text{PL}(\mathbf{D})$ . Indeed, considering all possible cases for the relative sizes of  $\sigma_{\text{in}}, \sigma_{\text{out}}$  and  $\sigma_*$  we find for all  $\delta$  sufficiently small

$$\text{Total Variation of } Dg \text{ on } (\xi_1 - \delta, \xi_4 + \delta) = \max \{ |2\sigma_* - \sigma_{\text{in}} - \sigma_{\text{out}}|, |\sigma_{\text{in}} - \sigma_{\text{out}}| \}.$$

Combining this with the expression equation 10 for the total variation of  $Df$  and the following elementary Lemma completes the proof.

**Lemma A.1.** *For any  $\sigma_1, \sigma_2, \sigma_3, \sigma_*$  satisfying equation 11 we have*

$$2\sigma_2 - \sigma_1 - \sigma_3 + |\sigma_1 - \sigma_{\text{in}}| + |\sigma_3 - \sigma_{\text{out}}| > \max \{ |2\sigma_* - \sigma_{\text{in}} - \sigma_{\text{out}}|, |\sigma_{\text{in}} - \sigma_{\text{out}}| \}.$$

*Proof.* We consider all four cases for the maximum on the right hand side. We have

$$\begin{aligned} & 2\sigma_2 - \sigma_1 - \sigma_3 + |\sigma_1 - \sigma_{\text{in}}| + |\sigma_3 - \sigma_{\text{out}}| - (2\sigma_* - \sigma_{\text{in}} - \sigma_{\text{out}}) \\ &= 2(\sigma_2 - \sigma_*) + |\sigma_1 - \sigma_{\text{in}}| - (\sigma_1 - \sigma_{\text{in}}) + |\sigma_3 - \sigma_{\text{out}}| - (\sigma_3 - \sigma_{\text{out}}) \\ &> 0, \end{aligned}$$

as desired. Similarly,

$$\begin{aligned} & 2\sigma_2 - \sigma_1 - \sigma_3 + |\sigma_1 - \sigma_{\text{in}}| + |\sigma_3 - \sigma_{\text{out}}| - (\sigma_{\text{in}} + \sigma_{\text{out}} - 2\sigma_*) \\ &= 2(\sigma_2 + \sigma_* - \sigma_1 - \sigma_3) + |\sigma_1 - \sigma_{\text{in}}| - (\sigma_{\text{in}} - \sigma_1) + |\sigma_3 - \sigma_{\text{out}}| - (\sigma_{\text{out}} - \sigma_3) \\ &> 0, \end{aligned}$$

as desired. Further,

$$\begin{aligned} & 2\sigma_2 - \sigma_1 - \sigma_3 + |\sigma_1 - \sigma_{\text{in}}| + |\sigma_3 - \sigma_{\text{out}}| - (\sigma_{\text{in}} - \sigma_{\text{out}}) \\ &= 2(\sigma_2 - \sigma_1) + |\sigma_1 - \sigma_{\text{in}}| - (\sigma_{\text{in}} - \sigma_1) + |\sigma_3 - \sigma_{\text{out}}| - (\sigma_3 - \sigma_{\text{out}}) \\ &> 0, \end{aligned}$$

as desired. Finally,

$$\begin{aligned} & 2\sigma_2 - \sigma_1 - \sigma_3 + |\sigma_1 - \sigma_{\text{in}}| + |\sigma_3 - \sigma_{\text{out}}| - (\sigma_{\text{out}} - \sigma_{\text{in}}) \\ &= 2(\sigma_2 - \sigma_3) + |\sigma_1 - \sigma_{\text{in}}| - (\sigma_1 - \sigma_{\text{in}}) + |\sigma_3 - \sigma_{\text{out}}| - (\sigma_{\text{out}} - \sigma_3) \\ &> 0, \end{aligned}$$

completing the proof.  $\square$

□

Proposition A.1 shows that any  $f \in \text{RidgelessReLU}(\mathbf{D})$  is either convex or concave on any interval of the form  $(x_i, x_{i+1})$ . This gives several useful consequences, for example the following

**Corollary A.1** (of Proposition A.1). *Fix  $f \in \text{RidgelessReLU}(\mathbf{D})$ . For each  $i = 1, \dots, m-1$ ,*

$$\text{sgn}(s_{\text{in}}(x_{i+1}) - s_i) + \text{sgn}(s_{\text{out}}(x_i) - s_i) = 0.$$

*Proof.* Suppose first  $\text{sgn}(s_{\text{out}}(x_i) - s_i) = 0$ . That is,  $s_{\text{out}}(x_i) = s_i$ . By Proposition A.1 we have  $s_{\text{out}}(x)$  is monotone for  $x \in (x_i, x_{i+1})$ . Thus, if there exists  $\xi \in (x_i, x_{i+1})$  so that  $Df(\xi) > s_i$ , then  $f(x_{i+1}) > (x_{i+1} - x_i)s_i + f(y_i) = y_{i+1}$ , contradicting the assumption that  $f \in \text{PL}(\mathbf{D})$ . A similar contradiction occurs if there exists  $\xi \in (x_i, x_{i+1})$  so that  $Df(\xi) < s_i$ . Hence, we conclude that  $s_{\text{in}}(x_{i+1}) = s_i$ , as desired. Next, suppose  $s_{\text{out}}(x_i) > s_i$ . In particular, there exists  $\xi_+ \in (x_i, x_{i+1})$  such that

$$s_{\text{in}}(f, \xi_+) > s_i.$$

Since  $f$  satisfies  $f(x_i) = y_i$  and  $f(x_{i+1}) = y_{i+1}$  there must exist  $\xi_- \in (x_i, x_{i+1})$  such that

$$s_{\text{in}}(f, \xi_-) < s_i.$$

By Proposition A.1,  $s_{\text{in}}(f, \xi)$  is monotone for  $\xi \in (x_i, x_{i+1})$ . We see by comparing  $s_{\text{in}}(f, \xi_{\pm})$  that it is in fact non-increasing. Since  $x_{i+1} - \delta > \xi_-$  for  $\delta$  sufficiently small, we conclude that  $s_{\text{in}}(x_{i+1}) < s_i$ , as desired. The case  $s_{\text{out}}(x_i) < s_i$  is analogous, completing the proof. □

For the remainder of the proof we fix  $f \in \text{RidgelessReLU}(\mathbf{D})$  and show that it must satisfy properties (1) and (2). To prove this, we use Proposition A.1 and Corollary A.1 to derive Propositions A.2, A.3, A.4, and A.5 that together determine the structure of  $f$ . Specifically, Propositions A.2, A.3 and a combination of Propositions A.4 and A.5 show that  $f$  satisfies property (1). Then, a different application of Propositions A.4 and A.5, together with the fact that  $f$  satisfies property (1), will imply that  $f$  satisfies property (2) as well.

**Proposition A.2** ( $f$  agrees with  $f_{\mathbf{D}}$  on colinear neighbors). *Fix  $i = 2, \dots, m-1$ . Suppose  $\epsilon_i = 0$ . Then*

$$s_{\text{out}}(x_{i-1}) = s_{\text{in}}(x_i) = s_{\text{out}}(x_i) = s_{\text{in}}(x_{i+1}) = s_{i-1} = s_i.$$

*Hence,  $f(x) = f_{\mathbf{D}}(x)$  for all  $x \in (x_{i-1}, x_{i+1})$ .*

*Proof.* By definition, since  $\epsilon_i = 0$ , we have  $s_i = s_{i-1}$ . Suppose for the sake of contradiction that

$$\text{at least one of } s_{\text{out}}(x_{i-1}), s_{\text{in}}(x_i), s_{\text{out}}(x_i), s_{\text{in}}(x_{i+1}) \text{ does not equal } s_i.$$

By Corollary A.1, this means that either one or both least one of the pairs  $(s_{\text{out}}(x_{i-1}), s_{\text{in}}(x_i))$  or  $(s_{\text{out}}(x_i), s_{\text{in}}(x_{i+1}))$  are both not equal to  $s_i$ . We will suppose without loss of generality that

$$\min\{s_{\text{out}}(x_{i-1}), s_{\text{in}}(x_i)\} < s_i < \max\{s_{\text{out}}(x_{i-1}), s_{\text{in}}(x_i)\}. \quad (12)$$

Note also that by Corollary A.1 and the fact that  $f(x_i) = y_i$  and  $f(x_{i+1}) = y_{i+1}$  we also have

$$\min\{s_{\text{out}}(x_i), s_{\text{in}}(x_{i+1})\} \leq s_i \leq \max\{s_{\text{out}}(x_i), s_{\text{in}}(x_{i+1})\}. \quad (13)$$

By definition, if  $\epsilon_i = 0$ , then  $s_{i-1} = s_i$ . By Proposition A.1, the total variation of  $Df$  on  $(x_{i-1} - \delta, x_{i+1} + \delta)$  equals, for all  $\delta$  sufficiently small,

$$\begin{aligned} & |s_{\text{out}}(x_{i+1}) - s_{\text{in}}(x_{i+1})| + |s_{\text{in}}(x_{i+1}) - s_{\text{out}}(x_i)| + |s_{\text{out}}(x_i) - s_{\text{in}}(x_i)| \\ & + |s_{\text{in}}(x_i) - s_{\text{out}}(x_{i-1})| + |s_{\text{out}}(x_{i-1}) - s_{\text{in}}(x_{i-1})|, \end{aligned}$$

which is bounded below by

$$|s_{\text{out}}(x_{i+1}) - s_{\text{in}}(x_{i+1})| + |s_{\text{in}}(x_{i+1}) - s_{\text{out}}(x_i)| + |s_{\text{in}}(x_i) - s_{\text{out}}(x_{i-1})| + |s_{\text{out}}(x_{i-1}) - s_{\text{in}}(x_{i-1})|.$$

Define  $g \in \text{PL}(\mathbf{D})$  to coincide with  $f$  on  $(x_{i-1}, x_{i+1})^c$  and to coincide with  $f_{\mathbf{D}}$  on  $(x_{i-1}, x_{i+1})$ . The total variation of  $Dg$  on  $(x_{i-1} - \delta, x_{i+1} + \delta)$  equals, for all  $\delta$  sufficiently small,

$$|s_{\text{out}}(x_{i+1}) - s_i| + |s_{\text{in}}(x_{i-1}) - s_i|.$$

Using that

$$|s_{\text{out}}(x_{i+1}) - s_i| \leq |s_{\text{out}}(x_{i+1}) - s_{\text{in}}(x_{i+1})| + |s_{\text{in}}(x_{i+1}) - s_i|$$

and

$$|s_{\text{in}}(x_{i-1}) - s_i| \leq |s_{\text{in}}(x_{i-1}) - s_{\text{out}}(x_{i-1})| + |s_{\text{out}}(x_{i-1}) - s_i|,$$

we find that the difference between the total variation of  $Df$  and  $Dg$  on  $(x_{i-1} - \delta, x_{i+1} + \delta)$  is bounded below by

$$|s_{\text{in}}(x_{i+1}) - s_{\text{out}}(x_i)| - |s_{\text{in}}(x_{i+1}) - s_i| + |s_{\text{in}}(x_i) - s_{\text{out}}(x_{i-1})| - |s_i - s_{\text{out}}(x_{i-1})|.$$

Note that if  $a, c \in \mathbb{R}$  and  $\min\{a, c\} \leq b \leq \max\{a, c\}$ , then we have

$$|c - a| - |a - b| = |b - c|.$$

Hence, using our assumptions equation 12 and equation 13, we conclude that

$$|s_{\text{in}}(x_i) - s_{\text{out}}(x_{i-1})| - |s_i - s_{\text{out}}(x_{i-1})| = |s_{\text{in}}(x_i) - s_i| > 0$$

and that

$$|s_{\text{in}}(x_{i+1}) - s_{\text{out}}(x_i)| - |s_{\text{in}}(x_{i+1}) - s_i| = |s_{\text{in}}(x_{i+1}) - s_i| \geq 0.$$

The difference between the total variation of  $Df$  and  $Dg$  on  $(x_{i-1} - \delta, x_{i+1} + \delta)$  is thus strictly positive for all  $\delta$  sufficiently small. Since  $f, g$  agree on  $(x_{i-1}, x_{i+1})^c$ , we find that  $\|Dg\|_{TV} < \|Df\|_{TV}$ , contradicting the minimality of  $\|Df\|_{TV}$  over  $\text{PL}(\mathbf{D})$ .  $\square$

Our next result, Proposition A.3, ensures that  $f$  and  $f_{\mathbf{D}}$  agree near infinity.

**Proposition A.3.** *Suppose  $f \in \text{RidgelessReLU}(\mathbf{D})$ . Then for  $x < x_2$  and  $x > x_{m-1}$  we have that  $f(x) = f_{\mathbf{D}}(x)$ .*

*Proof.* We focus on the analysis of  $f$  on  $(-\infty, x_2)$  since the conclusion on  $(x_{m-1}, \infty)$  follows by symmetry. To start note that  $Df(x) = s_{\text{out}}(x_1)$  for all  $x < x_1$ . Indeed, if this were not the case, we could define  $g \in \text{PL}(\mathbf{D})$  to coincide with  $f$  on  $(x_1, \infty)$  but to have slope  $s_{\text{out}}(x_1)$  on  $(-\infty, x_1)$ . This  $g$  belongs to  $\text{PL}(\mathbf{D})$  and satisfies  $\|Dg\|_{TV} < \|Df\|_{TV}$  since the total variation of its derivative on  $(-\infty, x_1 + \epsilon)^c$  equals that of  $Df$  but the total variation of  $Dg$  on  $(-\infty, x_1 + \epsilon)$  vanishes while that of  $f$  is non-zero.

Thus, we see that  $s_{\text{in}}(x_1) = s_{\text{out}}(x_1)$ . Let us now prove that  $f(x) = f_{\mathbf{D}}(x)$  for  $x \in (x_1, x_2)$ . This will imply  $s_{\text{out}}(x_1) = s_1$  and will complete the proof. Suppose for the sake of contradiction that  $s_{\text{in}}(x_2) \neq s_1$ . Then we have from Corollary A.1 that

$$\min\{s_{\text{out}}(x_1), s_{\text{in}}(x_2)\} < s_1 < \max\{s_{\text{out}}(x_1), s_{\text{in}}(x_2)\}.$$

Define  $g \in \text{PL}(\mathbf{D})$  to coincide with  $f$  on  $(x_2, \infty)$  and with  $f_{\mathbf{D}}$  on  $(-\infty, x_2)$ . The total variation of  $Dg$  on  $(-\infty, x_2 + \delta)$  for all  $\delta$  sufficiently small is

$$|s_{\text{out}}(x_2) - s_1|,$$

whereas the total variation of  $Df$  on the same interval is

$$|s_{\text{out}}(x_1) - s_{\text{in}}(x_2)| + |s_{\text{in}}(x_2) - s_{\text{out}}(x_2)|.$$

Since by construction  $Df$  and  $Dg$  agree on  $(x_2, \infty)$ , the following claim shows that  $\|Df\|_{TV} > \|Dg\|_{TV}$ , contradicting the minimality of  $\|Df\|_{TV}$  over  $\text{PL}(\mathbf{D})$ :

**Claim A.1.** *Suppose  $a, b, c \in \mathbb{R}$  satisfy*

$$\min\{a, b\} < c < \max\{a, b\}.$$

*Then for any  $d \in \mathbb{R}$  we have*

$$|d - c| < |a - b| + |b - d|$$

*Proof.* Suppose first  $a < c < b$ . Then

$$\begin{aligned} |a - b| + |b - d| - |d - c| &= b - a + |b - d| - |d - c| \\ &= c - a + |b - d| - (d - b) - |d - c| + (d - c) \\ &> 0, \end{aligned}$$

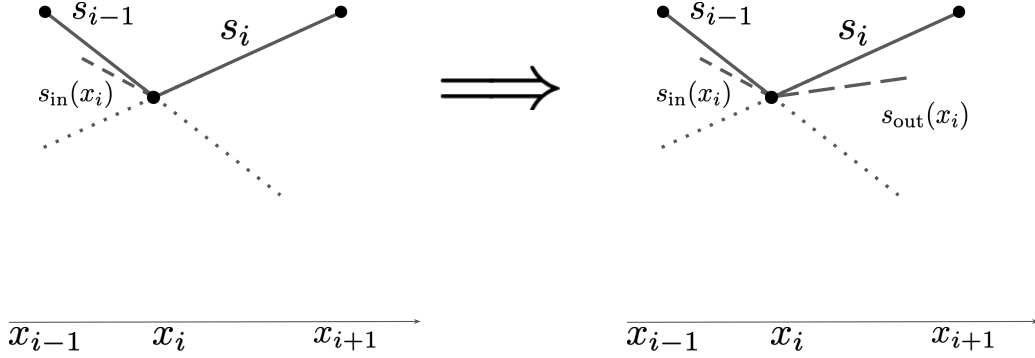Figure 9: The conclusion of Proposition A.4 when  $\epsilon_i = 1$ .

as desired. Similarly, suppose  $b < c < a$  then

$$|a - b| + |b - d| - |d - c| = a - b + |b - d| - |d - c|. \quad (14)$$

If  $d \geq c$  then  $d > b$  and the right hand side of equation 14 becomes

$$a - b + |b - d| - (d - c) = a - b + d - b - d + c = c - b + a - b > 0.$$

Finally, if  $d \leq c$  then the right hand side of equation 14 becomes

$$a - b + |d - b| - (c - d) = a - c + |d - b| - (d - b) > 0.$$

This completes the proof.  $\square$

$\square$

Proposition A.3 allows us to know the “initial” and “final” conditions  $s_{\text{in}}(x_2)$  and  $s_{\text{out}}(x_{m-1})$  for the slopes of  $f$ . In contrast, Proposition A.4 below allows us to take information about the incoming slope  $s_{\text{in}}(x_i)$  of  $f$  at  $x_i$  and use the local curvature information  $\epsilon_i$  at  $x_i$  to constrain the outgoing slope  $s_{\text{out}}(x_i)$ . See Figure 9.

**Proposition A.4** (How slope of  $f$  changes at  $x_i$ ). *Suppose  $\epsilon_i = 1$ . Then*

$$s_{i-1} \leq s_{\text{in}}(x_i) \leq s_i \implies s_{i-1} \leq s_{\text{in}}(x_i) \leq s_{\text{out}}(x_i) \leq s_i \quad (15)$$

*Similarly, suppose  $\epsilon_i = -1$ . Then*

$$s_{i-1} \geq s_{\text{in}}(x_i) \geq s_i \implies s_{i-1} \geq s_{\text{in}}(x_i) \geq s_{\text{out}}(x_i) \geq s_i \quad (16)$$

*Proof.* The proof of equation 16 is identical to that of equation 15, and we therefore focus on proving the latter. That is, we fix  $i = 2, \dots, m-1$  and assume  $\epsilon_i = 1$  and suppose that  $s_{i-1} \leq s_{\text{in}}(x_i) \leq s_i$ . For the sake of contradiction assume also that  $s_{\text{out}}(x_i) > s_i$ . By Corollary A.1 we have  $s_{\text{in}}(x_{i+1}) < s_i$  and therefore the total variation of  $Df$  on  $(x_i - \epsilon, x_{i+1} + \epsilon)$  is

$$|s_{\text{out}}(x_{i+1}) - s_{\text{in}}(x_{i+1})| + 2s_{\text{out}}(x_i) - s_{\text{in}}(x_{i+1}) - s_{\text{in}}(x_i).$$

Consider  $g \in \text{PL}(\mathcal{D})$  defined to be equal to  $f$  on  $(x_i, x_{i+1})^c$  and to  $f_{\mathcal{D}}$  on  $(x_i, x_{i+1})$ . The total variation of  $Dg$  on  $(x_i - \delta, x_{i+1} + \delta)$  for all  $\delta$  sufficiently small is

$$|s_{\text{out}}(x_{i+1}) - s_i| + s_i - s_{\text{in}}(x_i).$$

The following claim shows that the total variation of  $Dg$  on  $(x_i - \delta, x_{i+1} + \delta)$  for all  $\delta$  sufficiently small is strictly smaller than that of  $Df$ . Implies that  $\|Dg\|_{TV} < \|Df\|_{TV}$ , which is a contradiction.

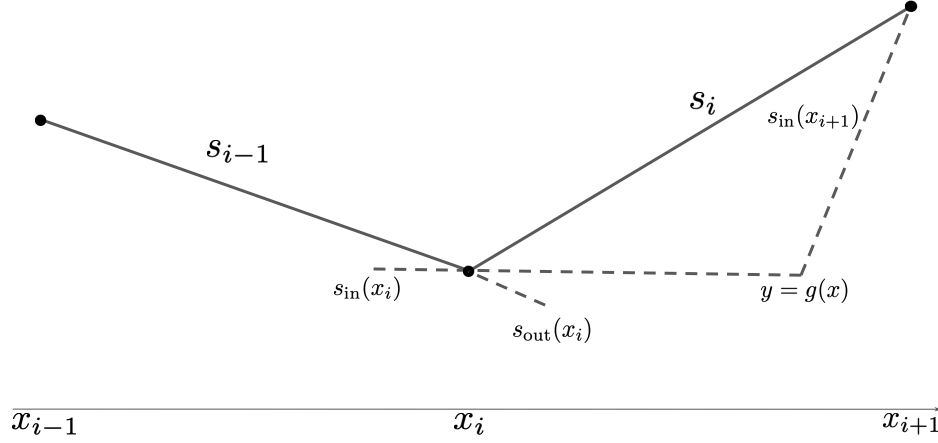

Figure 10: The function  $g(x)$  used to derive a contradiction with the assumption that  $s_{out}(x_i) < s_{in}(x_i)$  in Proposition A.4.

**Claim A.2.** Suppose  $a, b, c, d \in \mathbb{R}$  with  $\max\{a, b\} \leq c < d$ . Then for all  $x \in \mathbb{R}$  we have

$$|x - b| + 2d - a - b > |x - c| + c - a$$

*Proof.* Since  $|x - c| \leq |x - d| + d - c$ , we have

$$|x - b| + 2d - a - b - (|x - c| + c - a) \geq d - b > 0.$$

□

Next, again for the sake of contradiction, suppose that we still have  $\epsilon_i = 1$  and  $s_{i-1} \leq s_{in}(x_i) \leq s_{i+1}$  but also that  $s_{out}(x_i) < s_{in}(x_i)$ . Then, by Corollary A.1 we have  $s_{in}(x_{i+1}) > s_i$ . Moreover, by Proposition A.1 the total variation of  $Df$  on  $(x_i - \delta, x_{i+1} + \delta)$  for all  $\delta$  small enough is

$$|s_{out}(x_{i+1}) - s_{in}(x_{i+1})| + s_{in}(x_{i+1}) + s_{in}(x_i) - 2s_{out}(x_i).$$

Consider  $g \in \text{PL}(\mathbf{D})$  defined to be equal to  $f$  for  $x \in (x_i, x_{i+1})^c$  but for  $x \in (x_i, x_{i+1})$  given by

$$g(x) = \max\{(x - x_i)s_{in}(x_i) + y_i, (x - x_{i+1})s_{in}(x_{i+1}) + y_{i+1}\}.$$

See Figure 10. The total variation of  $Dg$  on  $(x_i - \epsilon, x_{i+1} + \epsilon)$  is

$$|s_{out}(x_{i+1}) - s_{in}(x_{i+1})| + s_{in}(x_{i+1}) - s_{in}(x_i).$$

Therefore the difference between the total variation of  $Df$  and  $Dg$  on  $(x_i - \delta, x_{i+1} + \delta)$  is

$$2(s_{in}(x_i) - s_{out}(x_i)) > 0.$$

Since  $f$  and  $g$  agree on  $(x_i, x_{i+1})^c$  this contradicts the minimality of  $\|Df\|_{TV}$  in  $\text{PL}(\mathbf{D})$  and completes the proof of equation 15. □

Proposition A.4 allows us to translate information about the incoming slope  $s_{in}(x_i)$  to outgoing information about  $s_{out}(x_i)$ . To make use of this, we also need a way to translate between outgoing information  $s_{out}(x_i)$  and incoming information  $s_{in}(x_{i+1})$ . This is done in the following Proposition, whose conclusion is illustrated in Figure 11.

**Proposition A.5** (How slope of  $f$  changes between  $x_i$  and  $x_{i+1}$  when  $\epsilon_i, \epsilon_{i+1}$  agree). *If  $\epsilon_i = 1$  and  $s_{i-1} \leq s_{in}(x_i) \leq s_{out}(x_i) \leq s_i$ , then*

$$\epsilon_{i+1} = 1 \implies s_i \leq s_{in}(x_{i+1}) \leq s_{i+1} \quad (17)$$

*Similarly, if  $\epsilon_i = -1$  and  $s_{i-1} \geq s_{in}(x_i) \geq s_{out}(x_i) \geq s_i$ , then*

$$\epsilon_{i+1} = -1 \implies s_i \geq s_{in}(x_{i+1}) \geq s_{i+1} \quad (18)$$

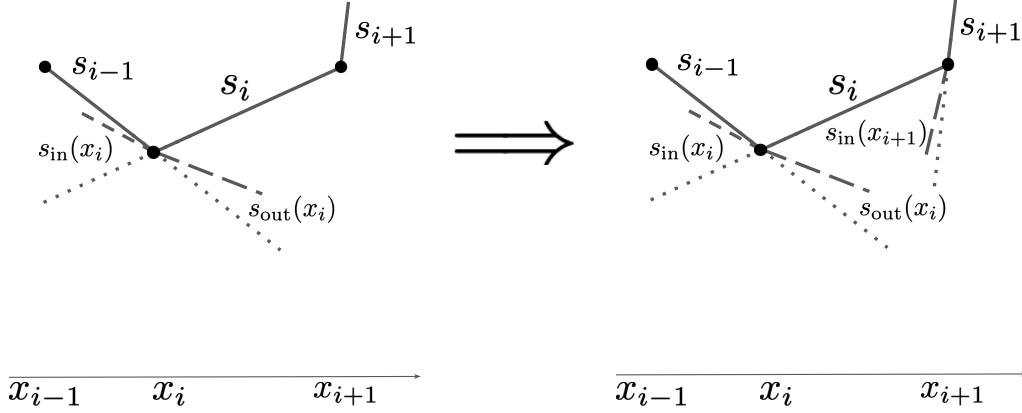Figure 11: Illustration of the conclusion in Proposition A.5 when  $\epsilon_i = \epsilon_{i+1} = 1$ .

*Proof.* The relation equation 18 follows in the same way as equation 17, and so we focus on showing the latter. That is, we suppose  $\epsilon_i = \epsilon_{i+1} = 1$  and that  $s_{i-1} \leq s_{in}(x_i) \leq s_{out}(x_i) \leq s_i$ . Corollary A.1 immediately gives  $s_{in}(x_{i+1}) \geq s_i$ . To complete the proof of equation 17 let us suppose for the sake of contradiction that in fact  $s_{in}(x_{i+1}) > s_{i+1}$ . To derive a contradiction, we need the following observation.

**Lemma A.2.** *Suppose that we have  $\epsilon_{i+1} = 1$  and  $s_{in}(x_{i+1}) > s_{i+1}$ . Then we must have  $s_{out}(x_{i+1}) < s_{in}(x_{i+1})$ .*

*Proof.* If  $i = m - 2$ , then the conclusion follows immediately from the fact that by Proposition A.3 we have  $s_{out}(x_{i+1}) = s_m$ . If  $i < m - 2$ , let us suppose for the sake of contradiction that  $s_{out}(x_{i+1}) \geq s_{in}(x_{i+1})$ . In particular, we have  $s_{out}(x_{i+1}) > s_{i+1}$ . Hence, by Corollary A.1 we have

$$s_{in}(x_{i+2}) < s_{i+1}.$$

Also by Corollary A.1 since  $s_{in}(x_{i+1}) > s_{i+1} > s_i$  we have

$$s_{out}(x_i) < s_i.$$

See Figure 12. The total variation of  $Df$  on  $(x_i - \delta, x_{i+2} + \delta)$  for  $\delta$  sufficiently small is therefore

$$|s_{out}(x_{i+2}) - s_{in}(x_{i+2})| + 2s_{out}(x_{i+1}) - s_{in}(x_{i+2}) - s_{in}(x_i)$$

Consider  $g \in \text{PL}(\mathcal{D})$  that coincides with  $f$  on  $(x_i, x_{i+2})^c$  and with  $f_{\mathcal{D}}$  on  $(x_i, x_{i+2})$ . The total variation of  $Dg$  on  $(x_i - \delta, x_{i+2} + \delta)$  for  $\delta$  sufficiently small is

$$|s_{out}(x_{i+2}) - s_{i+1}| + s_{i+1} - s_{in}(x_i)$$

Using that  $|s_{out}(x_{i+2}) - s_{i+1}| \leq |s_{out}(x_{i+2}) - s_{in}(x_{i+2})| + s_{i+1} - s_{in}(x_{i+2})$ , we conclude that the difference between the total variation of  $Df$  and  $Dg$  is bounded below by

$$2(s_{out}(x_{i+1}) - s_{i+1}) > 0,$$

contradicting the minimality of  $\|Df\|_{TV}$ .  $\square$

Returning now to the proof of equation 17, we continue to assume that  $s_{i-1} \leq s_{in}(x_i) \leq s_{out}(x_i) \leq s_i$  and  $s_{in}(x_{i+1}) > s_{i+1}$ . The previous Lemma ensures that therefore

$$s_{in}(x_{i+1}) > s_* := \max\{s_{i+1}, s_{out}(x_{i+1})\}.$$

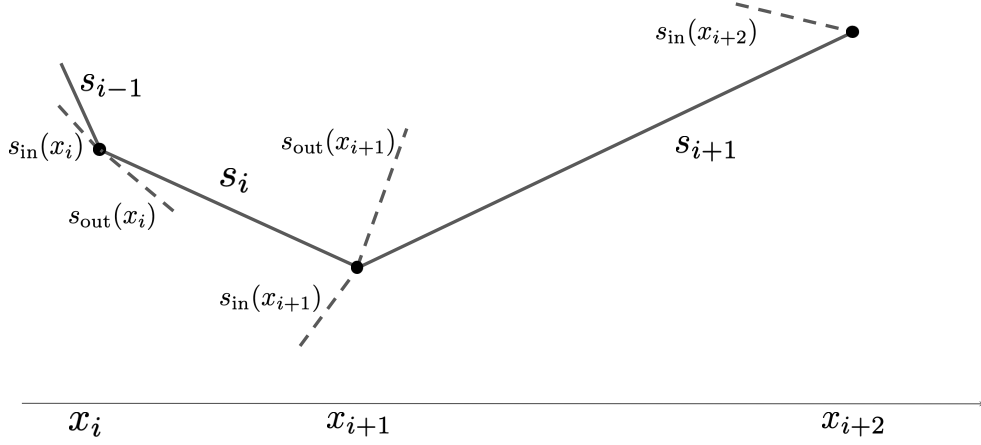

Figure 12: Illustration of hypotheses for contradiction in Lemma A.2.

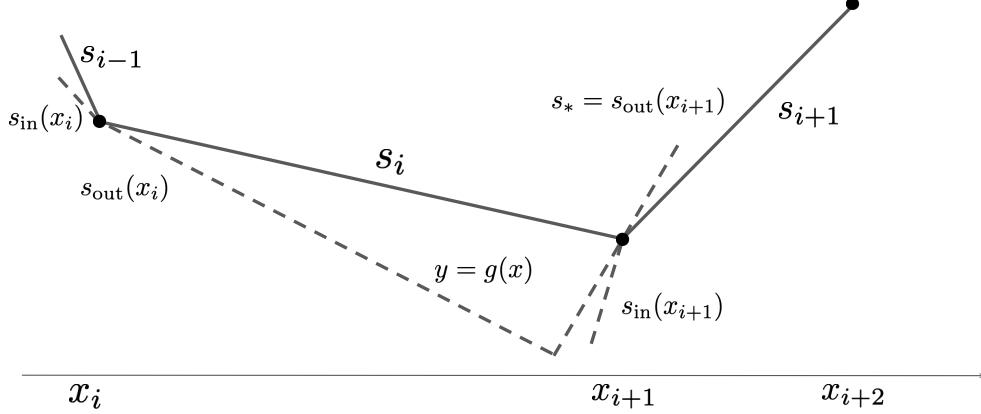Figure 13: Illustration of the function  $g$  used for contradiction at the end of the proof of Proposition A.5.

From this last condition we conclude that the total variation of  $Df$  on  $(x_i - \delta, x_{i+1} + \delta)$  for all  $\delta$  sufficiently small is

$$2s_{\text{in}}(x_{i+1}) - s_{\text{in}}(x_i) - s_{\text{out}}(x_{i+1}).$$

Consider  $g \in \text{PL}(\mathcal{D})$  defined to be equal to  $f$  on  $(x_i, x_{i+1})^c$  but on  $(x_i, x_{i+1})$  given by

$$g(x) = \max \{ (x - x_{i+1})s_* + y_{i+1}, (x - x_i)s_{\text{out}}(x_i) + y_i \}, \quad x \in (x_i, x_{i+1}).$$

See Figure 13. Since  $s_* \geq s_{i+1} > s_i$ , we find that the total variation of  $Dg$  on  $(x_i - \delta, x_{i+1} + \delta)$  for all  $\delta$  small enough equals

$$s_* - s_{\text{in}}(x_i).$$



The difference of the total variation of  $Df$  and  $Dg$  on  $(x_i - \delta, x_{i+1} + \delta)$  is therefore given by

$$s_{\text{in}}(x_{i+1}) - s_{i+1} + s_{\text{in}}(x_{i+1}) - s_* > 0.$$

This contradicts the minimality of  $\|Df\|_{TV}$  among  $\text{PL}(\mathbf{D})$  and completes the proof of equation 17.  $\square$

Proposition A.5 showed how to use information about the incoming and outgoing slopes of  $f$  at  $x_i$  to obtain information on the incoming slope at  $x_{i+1}$  if  $\epsilon_i = \epsilon_{i+1}$ . The following Proposition explains how to do this if instead  $\epsilon_i \neq \epsilon_{i+1}$ .

**Proposition A.6** (How slope of  $f$  changes between  $x_i$  and  $x_{i+1}$  when  $\epsilon_i, \epsilon_{i+1}$  disagree). *If  $\epsilon_i = 1$  and  $s_{i-1} \leq s_{\text{in}}(x_i) \leq s_{\text{out}}(x_i) \leq s_i$ , then*

$$\epsilon_{i+1} = -1 \implies s_{\text{out}}(x_i) = s_{\text{in}}(x_{i+1}) = s_i. \quad (19)$$

*Similarly, if  $\epsilon_i = -1$  and  $s_{i-1} \geq s_{\text{in}}(x_i) \geq s_{\text{out}}(x_i) \geq s_i$ , then*

$$\epsilon_{i+1} = 1 \implies s_{\text{out}}(x_i) = s_{\text{in}}(x_{i+1}) = s_i. \quad (20)$$

*Proof.* Relations equation 19 and equation 20 are proved in the same way, and so we focus on the former. To show equation 19, we suppose  $\epsilon_i = 1$ ,  $\epsilon_{i+1} = -1$  and that  $s_{i-1} \leq s_{\text{in}}(x_i) \leq s_{\text{out}}(x_i) \leq s_i$ . Suppose for the sake of contradiction that  $s_{\text{out}}(x_i) < s_i$ . Then, by Corollary A.1 we have  $s_{\text{in}}(x_{i+1}) > s_i$ . To see why this cannot occur, we give somewhat different arguments depending on whether  $s_{\text{out}}(x_{i+1}) > s_i$  or  $s_{\text{out}}(x_{i+1}) \leq s_i$ .

Let us first suppose  $s_{\text{out}}(x_{i+1}) > s_i$ . By Corollary A.1 we have  $s_{\text{in}}(x_{i+2}) < s_{i+1}$ . Thus, the total variation of  $Df$  on  $(x_i - \delta, x_{i+2} + \delta)$  equals

$$|s_{\text{out}}(x_{i+2}) - s_{\text{in}}(x_{i+2})| + s_{\text{out}}(x_{i+2}) - s_{\text{in}}(x_{i+2}) + |s_{\text{out}}(x_{i+1}) - s_{\text{in}}(x_{i+1})| + s_{\text{in}}(x_{i+1}) - s_{\text{in}}(x_i),$$

which is bounded below by

$$|s_{\text{out}}(x_{i+2}) - s_{\text{in}}(x_{i+2})| + 2s_{\text{out}}(x_{i+1}) - s_{\text{in}}(x_{i+2}) - s_{\text{in}}(x_i).$$

Define  $g \in \text{PL}(\mathbf{D})$  to coincide with  $f$  on  $(x_i, x_{i+2})^c$  and with  $f_{\mathbf{D}}$  on  $(x_i, x_{i+2})$ . The total variation of  $Dg$  on  $(x_i - \delta, x_{i+2} + \delta)$  is

$$|s_{\text{out}}(x_{i+2}) - s_{\text{in}}(x_{i+2})| + 2s_i - s_{\text{in}}(x_{i+2}) - s_{\text{in}}(x_i).$$

Hence, the difference between the total variation of  $Df$  and  $Dg$  is bounded below by

$$2(s_{\text{out}}(x_{i+1}) - s_i) > 0.$$

This contradicts the minimality of  $\|Df\|_{TV}$ . Let us now consider the other case:  $s_{\text{out}}(x_{i+1}) \leq s_i$ . In this case, we have that  $s_{\text{in}}(x_{i+1}) > s_{\text{out}}(x_{i+1})$ . Thus, the total variation of  $Df$  on  $(x_i - \delta, x_{i+1} + \delta)$  is

$$2s_{\text{in}}(x_{i+1}) - s_{\text{in}}(x_i) - s_{\text{out}}(x_{i+1}).$$

Define  $g \in \text{PL}(\mathbf{D})$  to coincide with  $f$  on  $(x_i, x_{i+1})^c$  and with  $f_{\mathbf{D}}$  on  $(x_i, x_{i+1})$ . The total variation of  $Dg$  on  $(x_i - \delta, x_{i+1} + \delta)$  is

$$2s_i - s_{\text{out}}(x_{i+1}) - s_{\text{in}}(x_i).$$

Hence, the difference between the total variation of  $Df$  and  $Dg$  is bounded below by

$$2(s_{\text{in}}(x_{i+1}) - s_i) > 0.$$

This contradicts the minimality of  $\|Df\|_{TV}$ , completing the proof of Proposition A.6.  $\square$

We are now ready to show that any  $f \in \text{RidgelessReLU}(\mathbf{D})$  satisfies (1) and (2). We already know from Propositions A.2 and A.3 that  $f$  satisfies properties (1a) and (1b). In order to check that  $f$  satisfies (1c) and (2), we will use the following result.

**Lemma A.3.** *Suppose  $f \in \text{RidgelessReLU}(\mathbf{D})$ . For  $i = 2, \dots, m-1$  we have*

$$\begin{aligned} \epsilon_i = 1 &\implies s_{i-1} \leq s_{\text{in}}(x_i) \leq s_{\text{out}}(x_i) \leq s_i \\ \epsilon_i = -1 &\implies s_{i-1} \geq s_{\text{in}}(x_i) \geq s_{\text{out}}(x_i) \geq s_i \end{aligned}$$

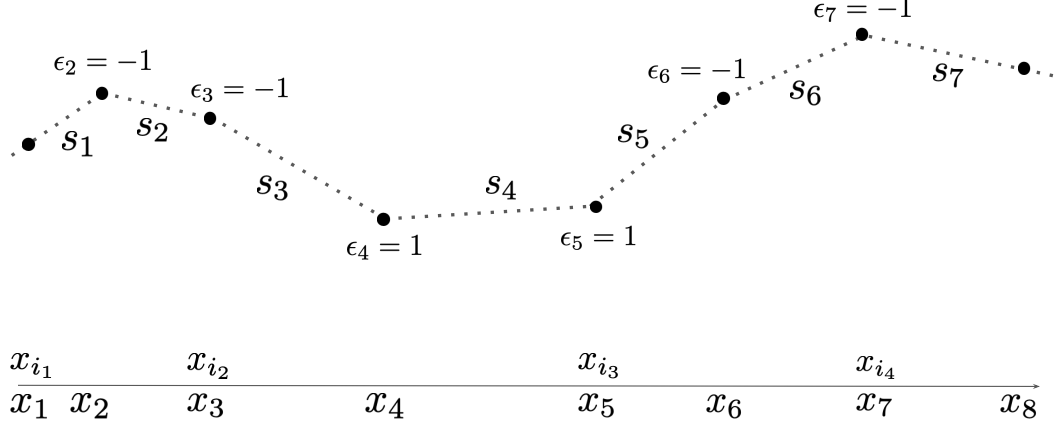Figure 14: Illustration of the set of discrete inflections points  $\mathbf{I}$  used in Proposition A.7.

*Proof.* We induct on  $i$ . When  $i = 2$ , we have from Proposition A.3 that

$$s_1 = s_{\text{in}}(x_2).$$

If  $\epsilon_2 = 1$ , we may therefore apply Proposition A.4 to conclude that  $s_1 \leq s_{\text{in}}(x_1) \leq s_{\text{out}}(x_2) \leq s_2$ , as desired. The case  $\epsilon_2 = -1$  is similar, completing the base case. Let us now suppose we have the claim for  $2, \dots, i$ . Suppose that  $\epsilon_{i+1} = 1$  (the case  $\epsilon_{i+1} = -1$  is similar). If  $\epsilon_i \neq 1$ , then we conclude from the definition of  $\epsilon_{i+1} = 1$ , the inductive hypothesis, and Propositions A.2 and A.6 that

$$s_i = s_{\text{in}}(x_{i+1}) \leq s_{i+1}$$

Hence, we may apply Proposition A.4 to conclude that  $s_i = s_{\text{in}}(x_{i+1}) \leq s_{\text{out}}(x_{i+1}) \leq s_{i+1}$ , as desired. This completes the inductive step and hence the proof of this Lemma.  $\square$

Lemma A.3 in combination with Corollary A.1 immediately implies that  $f$  satisfies property (2). Finally, in combination with Proposition A.6, Lemma A.3 also shows that  $f$  satisfies property (1c). This completes the proof that  $f \in \text{RidgelessReLU}(\mathbf{D})$  satisfies properties (1) and (2). It remains to show that every  $f$  which satisfies Properties (1) and (2) belongs to  $\text{RidgelessReLU}(\mathbf{D})$ , which we now establish.

**Proposition A.7.** *Suppose  $f \in \text{PL}(\mathbf{D})$  satisfies conditions (1) and (2) of Theorem 1.2. Then,  $f$  belongs to  $\text{RidgelessReLU}(\mathbf{D})$ .*

*Proof.* Define the set  $\mathbf{I} \subseteq \{1, \dots, m\}$  of discrete inflection points for the connect-the-dots interpolant  $f_{\mathbf{D}}$  (see Figure 14):

$$\mathbf{I} := \{i \in \{2, \dots, m-2\} \mid \epsilon_i \neq \epsilon_{i+1}\} \cup \{1, m-1\} = \{i_1 = 1 < i_2 < \dots < i_{|\mathbf{I}|-1} < i_{|\mathbf{I}|} = m-1\}.$$

By construction, for each  $q = 1, \dots, |\mathbf{I}| - 1$  on the intervals  $(x_{i_q}, x_{i_q+1}), \dots, (x_{i_{q+1}}, x_{i_{q+1}+1})$  the sequence of slopes  $s_{i_q}, \dots, s_{i_{q+1}}$  of  $f_{\mathbf{D}}$  is either non-increasing or non-decreasing. Hence,

$$\sum_{j=i_q}^{i_{q+1}-1} |s_j - s_{j+1}| = |s_{i_q} - s_{i_{q+1}}|$$

and we find

$$\|Df_{\mathbf{D}}\|_{TV} = \sum_{i=1}^{m-1} |s_i - s_{i+1}| = \sum_{q=2}^{|\mathbf{I}|} |s_{i_q} - s_{i_{q-1}}|. \quad (21)$$

The key observation is

$$f \in \text{PL}(\mathbf{D}) \text{ satisfies (1) and (2)} \implies \|Df\|_{TV} = \|Df_{\mathbf{D}}\|_{TV} = \sum_{q=2}^{|\mathbf{I}|} |s_{i_q} - s_{i_{q-1}}|. \quad (22)$$

Indeed, by property (2), the function  $f$  is either convex or concave on any interval of the form  $(x_{i_q}, x_{i_{q+1}+1})$ . Therefore,  $Df$  is monotone on any such interval. Thus, we find that

$$\|Df\|_{TV} = \sum_{q=2}^{|\mathbf{I}|} |s_{\text{out}}(f, x_{i_q}) - s_{\text{out}}(f, x_{i_{q-1}})|.$$

But property (1) guarantees that

$$s_{\text{out}}(f, x_{i_q}) = s_{i_q}$$

and for all  $q = 1, \dots, |\mathbf{I}|$ , proving equation 22. The proof of Proposition A.7 therefore follows from the following result, which was already observed in Theorem 3.3 of Savarese et al. (2019).

**Lemma A.4.** *We have*

$$\text{RidgelessReLU}(\mathbf{D}) = \left\{ f \in \text{PL}(\mathbf{D}) \mid \|Df\|_{TV} = \|Df_{\mathbf{D}}\|_{TV} \right\} \quad (23)$$

*Proof.* Consider any  $f \in \text{RidgelessReLU}(\mathbf{D})$ . We seek to show that  $\|Df\|_{TV} \geq \|Df_{\mathbf{D}}\|_{TV}$ . Note that for any sequence of points  $\xi_1 < \dots < \xi_k$  at which  $Df(\xi_j)$  exists, we have

$$\|Df\|_{TV} \geq \sum_{j=1}^{k-1} |Df(\xi_{j+1}) - Df(\xi_j)|.$$

We will now exhibit a set of points where the right hand side equals  $\|Df_{\mathbf{D}}\|_{TV}$ . To begin, note that by Proposition A.3 we have  $f(x) = f_{\mathbf{D}}(x)$  for  $x < x_2$  and  $x > x_{m-1}$ . For all  $\xi_{i_1} \in (x_1, x_2) = (x_{i_1}, x_{i_1+1})$  and  $\xi_{i_{|\mathbf{I}|}} \in (x_{m-1}, x_m) = (x_{i_{|\mathbf{I}|}-1}, x_{i_{|\mathbf{I}|}})$  we thus have

$$Df(\xi_{i_1}) = s_1, \quad Df(\xi_{i_{|\mathbf{I}|}}) = s_m.$$

Further, for any  $i = 2, \dots, m-1$  on any interval  $(x_i, x_{i+1})$ , there exist  $\xi_{i,\pm}$  such that  $Df(\xi_{i,\pm})$  exist and

$$Df(\xi_{i,+}) \geq s_i, \quad Df(\xi_{i,-}) \leq s_i.$$

In particular, for  $q = 2, \dots, |\mathbf{I}| - 1$  we may find  $\xi_{i_q}$  satisfying

$$\xi_{i_q} \in (x_{i_q}, x_{i_{q+1}}), \quad \text{sgn}(s_{i_q} - Df(\xi_{i_q})) = \epsilon_{i_{q+1}}.$$

As we saw just before this Lemma, for each  $i = 1, \dots, |\mathbf{I}| - 1$  we have

$$\text{sgn}(s_{i_{q+1}} - s_{i_q}) = \epsilon_{i_{q+1}}.$$

Hence, for each  $q = 1, \dots, |\mathbf{I}| - 1$  we conclude

$$|Df(\xi_{i_q}) - Df(\xi_{i_{q+1}})| \geq |s_{i_q} - s_{i_{q+1}}|.$$

Thus,

$$\|Df\|_{TV} \geq \sum_{q=1}^{|\mathbf{I}|-1} |s_{i_q} - s_{i_{q+1}}| = \|Df_{\mathbf{D}}\|_{TV},$$

as desired. □

□
